# Supplementary material for: Virulent Phages Isolated from A Smear-Ripened Cheese are Also Detected in Reservoirs of the Cheese Factory
Source: Preprints.org preprint supplement (doi:10.20944/preprints202206.0105.v1), 2022-06-07
Supplement: Supplementary file 1 [file supplementary]

**Supplementary Table 1.** Sensitive/resistant strains to Voltaire and Montesquieu

| **Strain or isolate** | **Source** | **Sensitivity to Voltaire** | **Sensitivity to Montesquieu** |
| --- | --- | --- | --- |
| 16 | Studied cheese | - | - |
| 26 | Studied cheese | - | + |
| 33 | Studied cheese | - | + |
| 43 | Studied cheese | - | - |
| 51 | Studied cheese | - | + |
| 52 | Studied cheese | - | + |
| 53 | Studied cheese | - | + |
| 65 | Studied cheese | + | - |
| 119 | Studied cheese | + | - |
| 135 | Studied cheese | - | - |
| 183 | Studied cheese | - | - |
| 186 | Studied cheese | - | + |
| 201 | Studied cheese | - | + |
| *G. arilaitensis* Re117 (DSM 16368) | Reblochon cheese | - | - |
| *G. bergerei* Ca106 (DSM 16367) | Camembert cheese | - | - |
| *G. nicotianae* DSM 20123 | Air of tobacco warehouses | - | - |
| *G. uratoxydans* DSM 20647 | Humus soil | - | - |

**Supplementary Table 2.** AMGs encoded by each phage

| **Phage** | **Number of CDS** | **CDS** | **Function** |
| --- | --- | --- | --- |
| Voltaire | 0 | / | / |
| Montesquieu | 2 | MONT_40 | ABC (ATP-Binding Cassette) transporter |
| MONT_41 | ACCD (Aminocyclopropane-1-carboxylate deaminase) |
| Rousseau | 3 | ROUS_25 | Putative glutaminyl cyclase |
| ROUS_48 | Thioredoxin-like protein |
| ROUS_51 | S-adenosyl-dependent methyltransferase |
| Diderot | 1 | DID_9 | Ribonuclease Z |
| D'Alembert | 7 | DAL_34 | Thioredoxin |
| DAL_47 | Putative antitoxin |
| DAL_102 | Transglycosylase |
| DAL_103 | Chaperonin |
| DAL_106 | S-adenosyl-dependent methyltransferase |
| DAL_114 | Ntn_hydrolase-like protein |
| DAL_134 | Nucleoside Triphosphate Pyrophosphohydrolase |
